# Supplementary material for: Integrative Bioinformatics Analysis Unveils Neuro-cancer Crosstalk- related Genes and Establishes Prognostic Risk Model in Glioblastoma
Source: Research Square preprint supplement (doi:10.21203/rs.3.rs-8185893/v1), 2026-01-12
Supplement: Supplementary file 2 [file c2bd6f1b784a63f4595489da.xlsx]

## Sheet: Sheet1
gene	Full name
SEMA4F	ssemaphorin 4F
ADRB2	adrenoceptor beta 2
ADRB3	adrenoceptor beta 3
MAP2	microtubule associated protein 2
NGFR	nerve growth factor receptor
NTRK1	neurotrophic receptor tyrosine kinase 1
NTRK2	neurotrophic receptor tyrosine kinase 2
NTRK3	neurotrophic receptor tyrosine kinase 3
L1CAM	L1 cell adhesion molecule
GDNF	glial cell derived neurotrophic factor
GFRA1	GDNF family receptor alpha 1
GFRA2	GDNF family receptor alpha 2
GFRA3	GDNF family receptor alpha 3
NTN1	netrin 1
SLIT2	slit guidance ligand 2
GRIN1	glutamate ionotropic receptor NMDA type subunit 1
GRIN2A	glutamate ionotropic receptor NMDA type subunit 2A
GRIN2B	glutamate ionotropic receptor NMDA type subunit 2B
GRIN2C	glutamate ionotropic receptor NMDA type subunit 2C
GRIN2D	glutamate ionotropic receptor NMDA type subunit 2D
GRIN3A	glutamate ionotropic receptor NMDA type subunit 3A
GRIN3B	glutamate ionotropic receptor NMDA type subunit 3B
CHRM1	cholinergic receptor muscarinic 1
CHRM2	cholinergic receptor muscarinic 2
CHRM3	cholinergic receptor muscarinic 3
CHRM4	cholinergic receptor muscarinic 4
CHRNA1	cholinergic receptor nicotinic alpha 1 subunit
CHRNA2	cholinergic receptor nicotinic alpha 2subunit
CHRNA3	cholinergic receptor nicotinic alpha 3 subunit
CHRNA4	cholinergic receptor nicotinic alpha 4 subunit
CHRNA5	cholinergic receptor nicotinic alpha 5 subunit
CHRNA6	cholinergic receptor nicotinic alpha 6 subunit
CHRNA7	cholinergic receptor nicotinic alpha 7 subunit
CHRNA9	cholinergic receptor nicotinic alpha 9 subunit
CHRNB2	cholinergic receptor nicotinic beta 2 subunit
CHRNB4	cholinergic receptor nicotinic beta 4 subunit
CHRNG	cholinergic receptor nicotinic gamma subunit
CHRNB1	cholinergic receptor nicotinic beta 1 subunit
CHRND	cholinergic receptor nicotinic delta subunit
CHRNE	cholinergic receptor nicotinic epsilon subunit
CHRNA10	cholinergic receptor nicotinic alpha 10 subunit
TACR1	tachykinin receptor 1
